# Supplementary material for: Rituximab-induced HMGB1 release is associated with inhibition of STAT3 activity in human diffuse large B-cell lymphoma
Source: PubMed Central journal article supplement (PMC4695028; doi:10.18632/oncotarget.4816), 2015-07-31
Supplement: oncotarget-06-27816-s001.pdf [file oncotarget-06-27816-s001.pdf]

SUPPLEMENTARY FIGURES AND TABLES

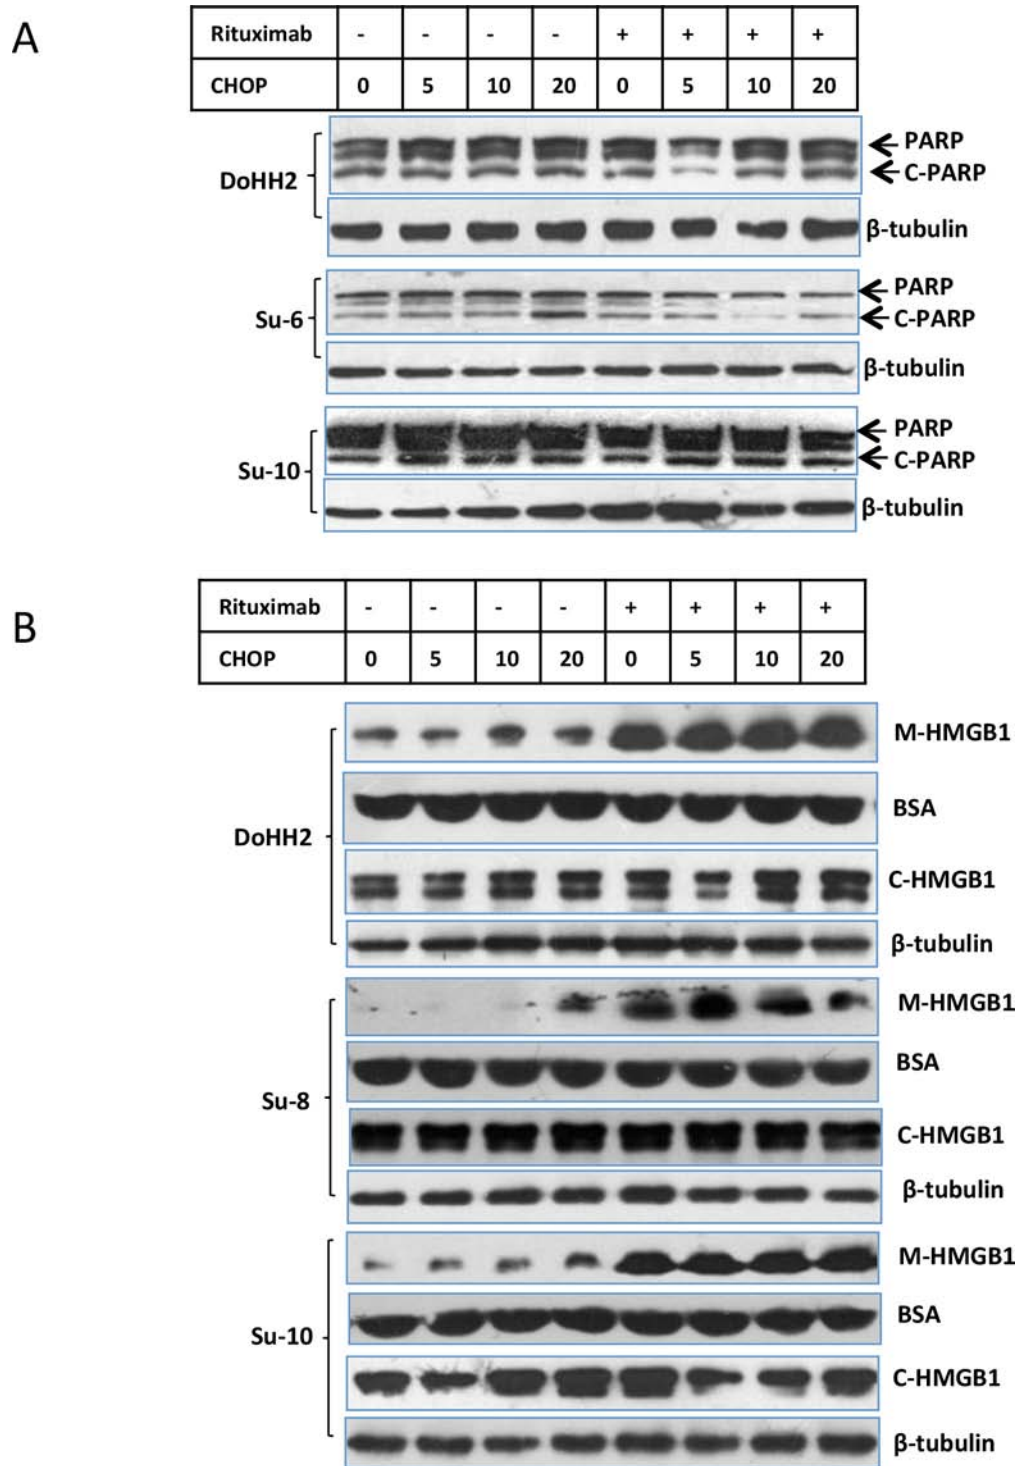

**Supplementary Figure S1: Comparison of CHOP and R-CHOP-induced PARP cleavage and HMGB1 release.** DLBCL cell lines were treated with CHOP or R-CHOP for 24 hours. Cytosolic proteins were used to test PARP Cleavage **A.** and HMGB1 expression (C-HMGB1) **B.** Conditioned medium (50  $\mu$ l) was used to determine HMGB1 release (M-HMGB1) (B) BSA and  $\beta$ -tubulin were used as loading controls for conditioned medium Cytosolic proteins, respectively.

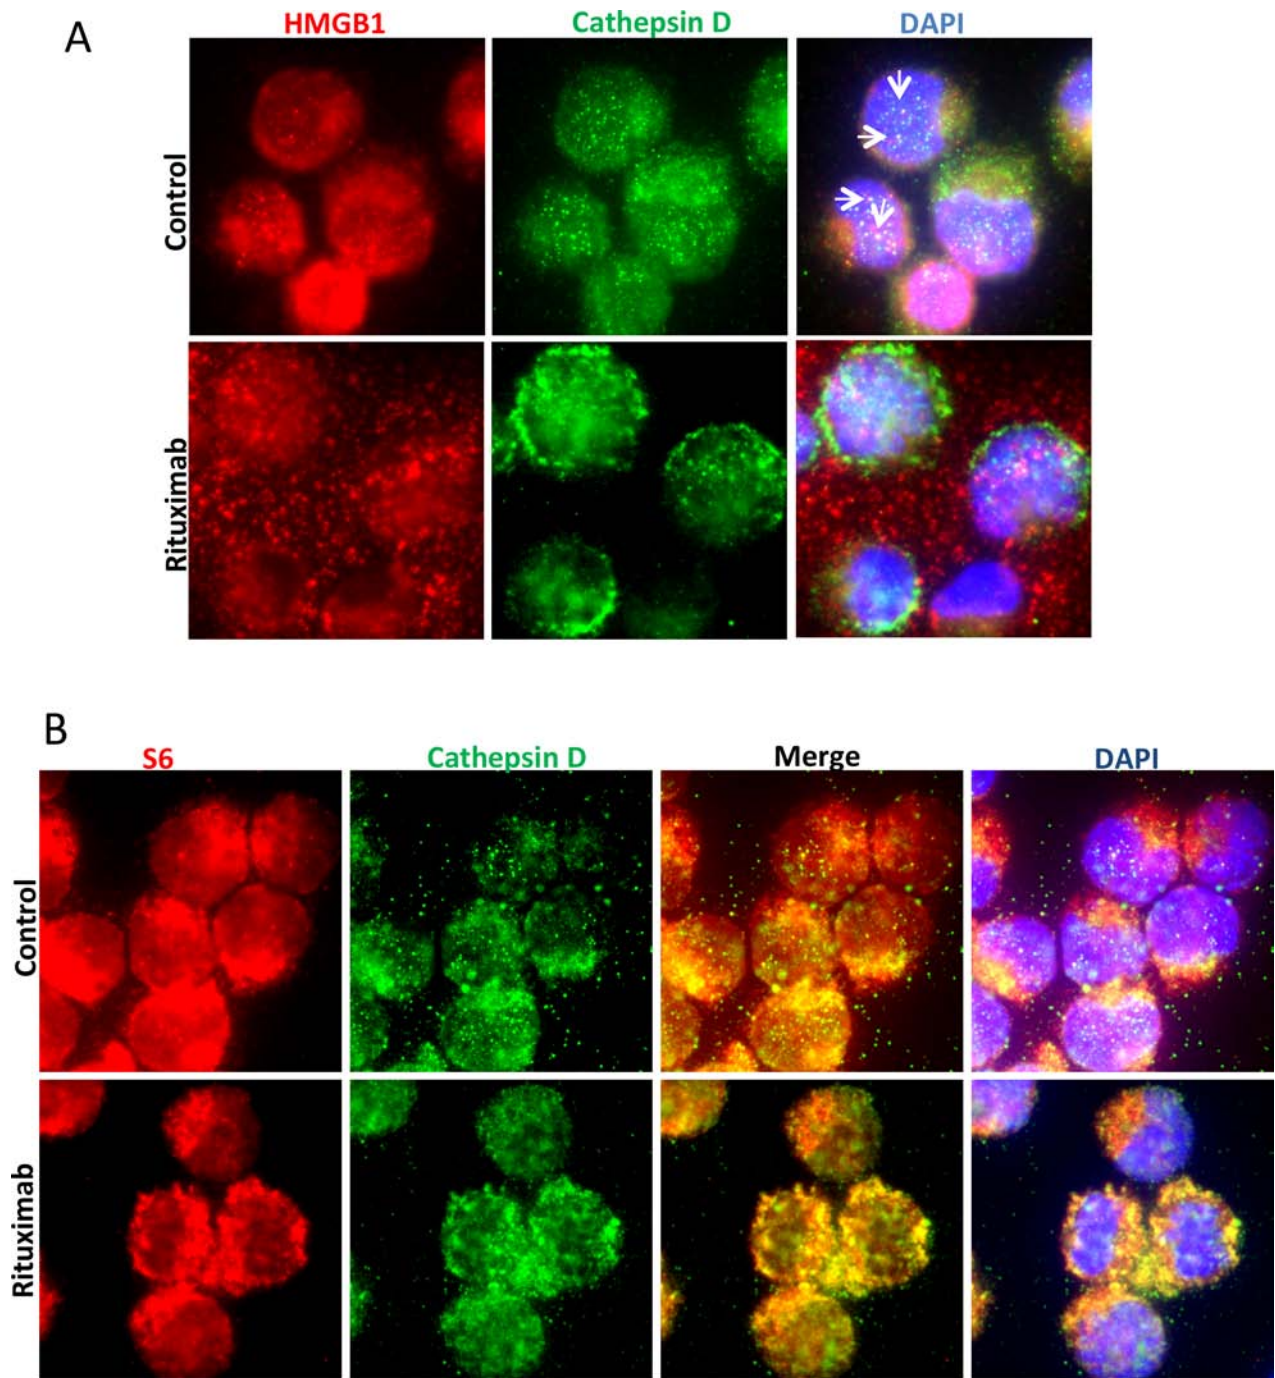

**Supplementary Figure S2: The association between HMGB1 and cathepsin D release.** DoHH2 cells were treated with Rituximab for 4 hours. Cells on slides were fixed/permeabilized and stained with rabbit anti-HMGB1/mouse anti-cathepsin D **A**, rabbit anti-S6/mouse anti-cathepsin D **B**, and rabbit anti-S6/mouse HMGB1

(Continued)

C

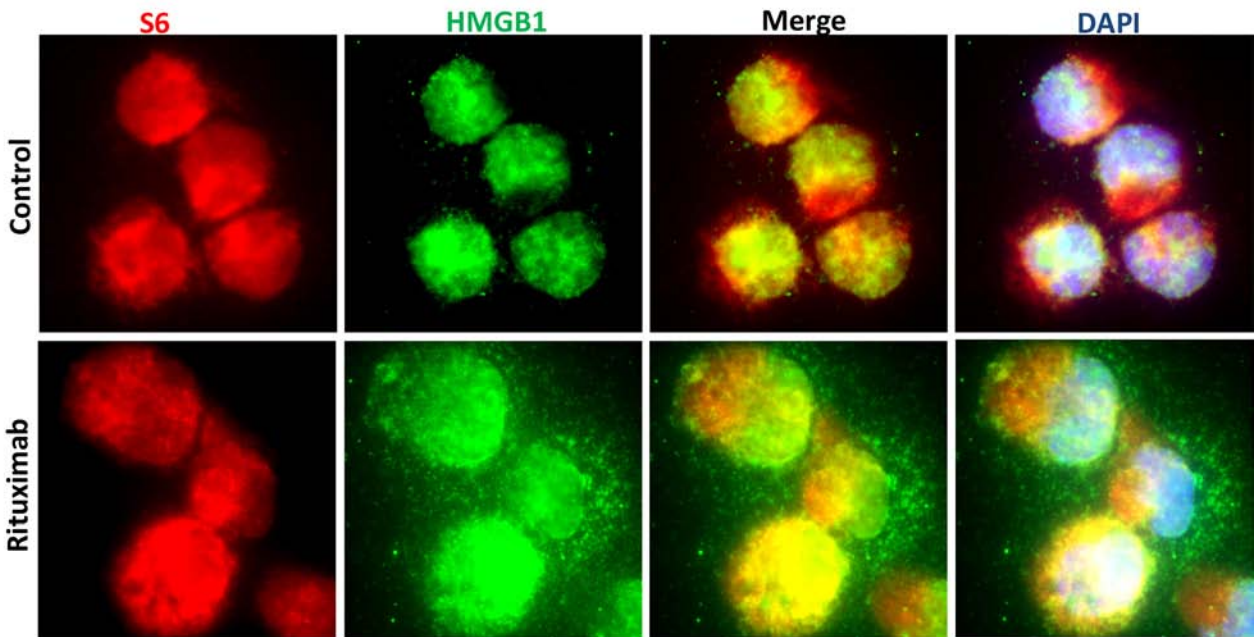

D

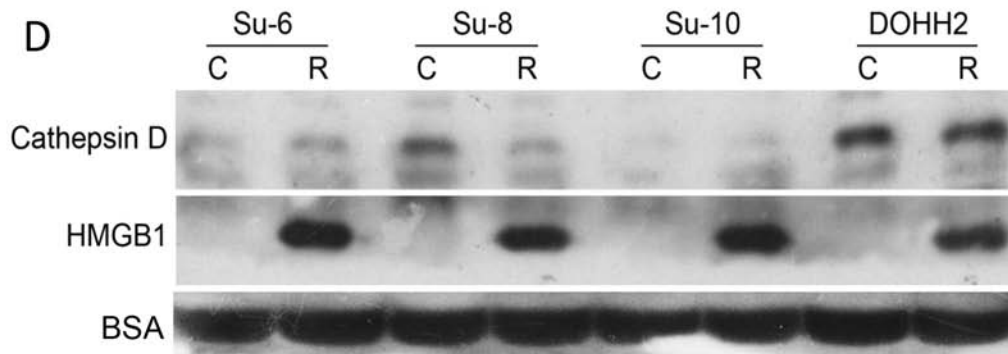

**Supplementary Figure S2: (Continued) C, D.** Four DLBCL cell lines were treated with rituximab for 4 hours. 50  $\mu$ l of conditioned medium was used for Western Blotting. BSA was used as a loading control. 'C' means control and 'R' indicates Rituximab.

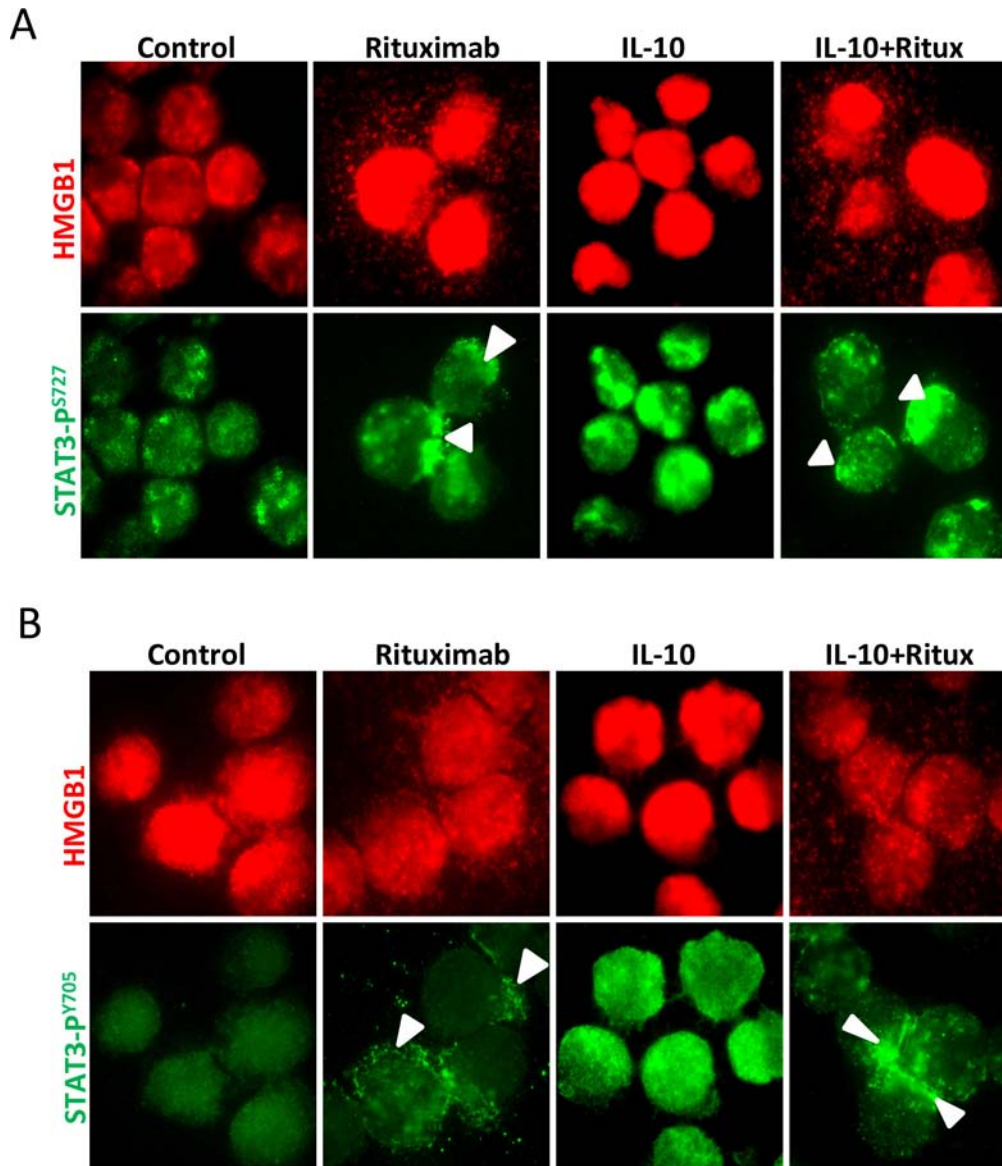

Supplementary Figure S3: Single color images of rituximab induced intracellular shuttling of STAT3 (green) and HMGB1 (red). A. STAT3-P<sup>S727</sup> and B. STAT3-P<sup>Y705</sup>. Arrow head indicate cytoplasmic localization of STAT3.

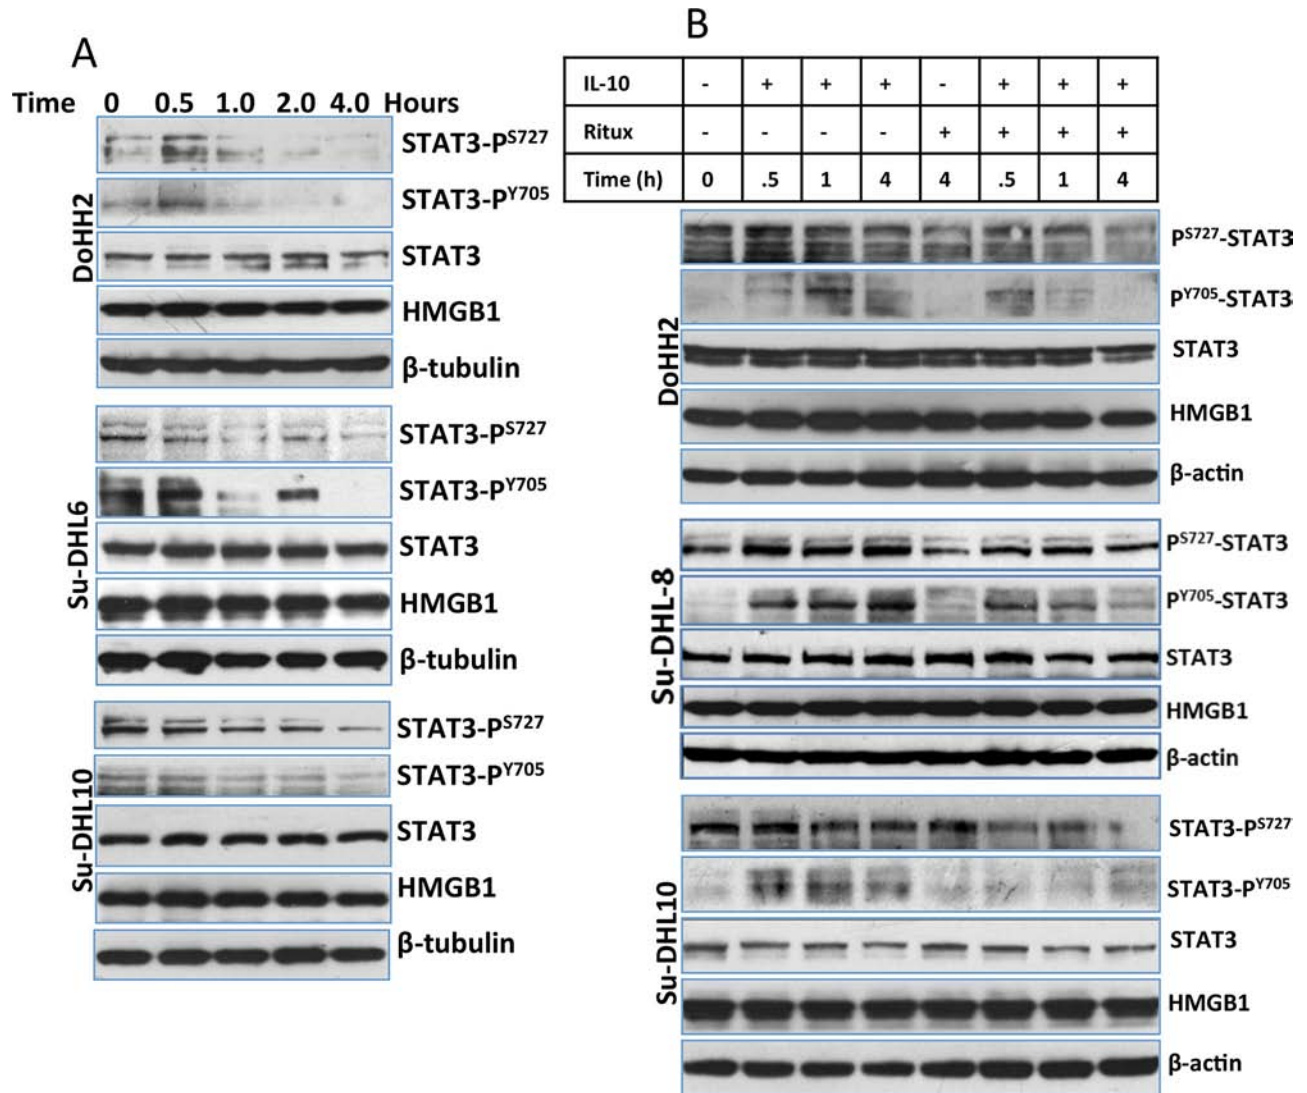

**Supplementary Figure S4: Rituximab-induced STAT3 inhibition.** A. Time dependent course of rituximab-induced inhibition of STAT3. B. Rituximab-induced STAT3 inhibition on IL-10 treated cells.

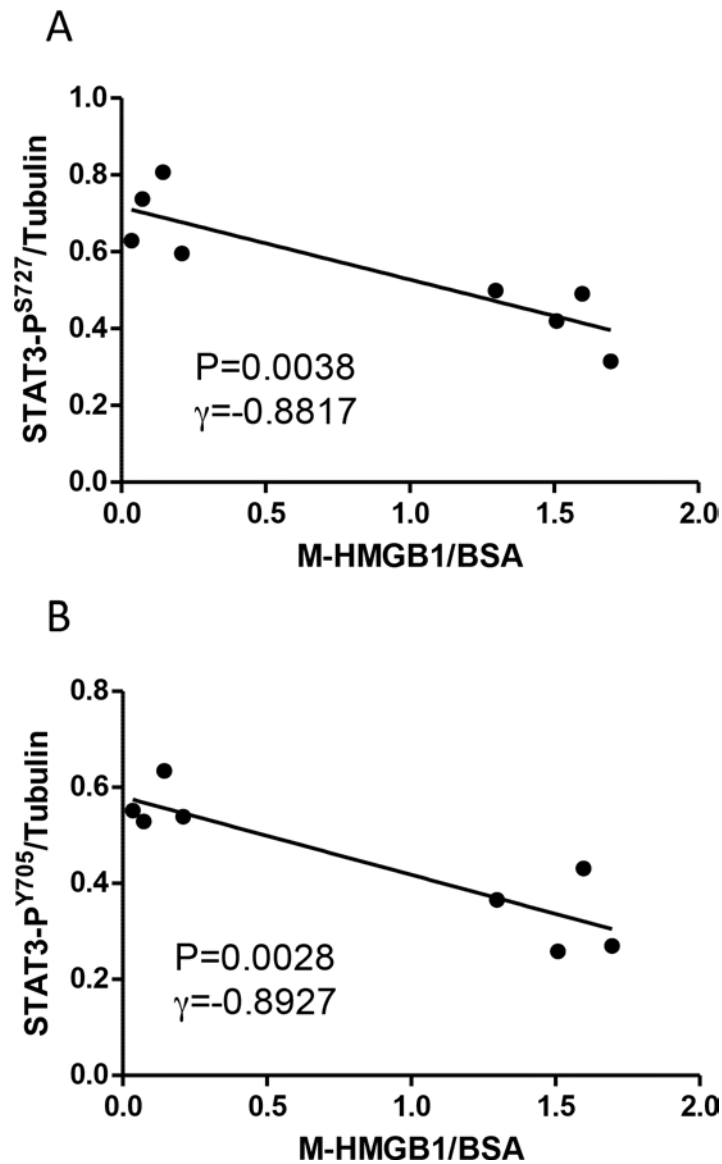

**Supplementary Figure S5: Correlation between STAT3 activity and HMGB1 release. A. STAT3-P<sup>S727</sup>; B. STAT3-P<sup>Y705</sup>.** Data shown are mean values from Figure 4 D, 4E and 4G and analyzed by Pearson's Correlation using Prism Software.

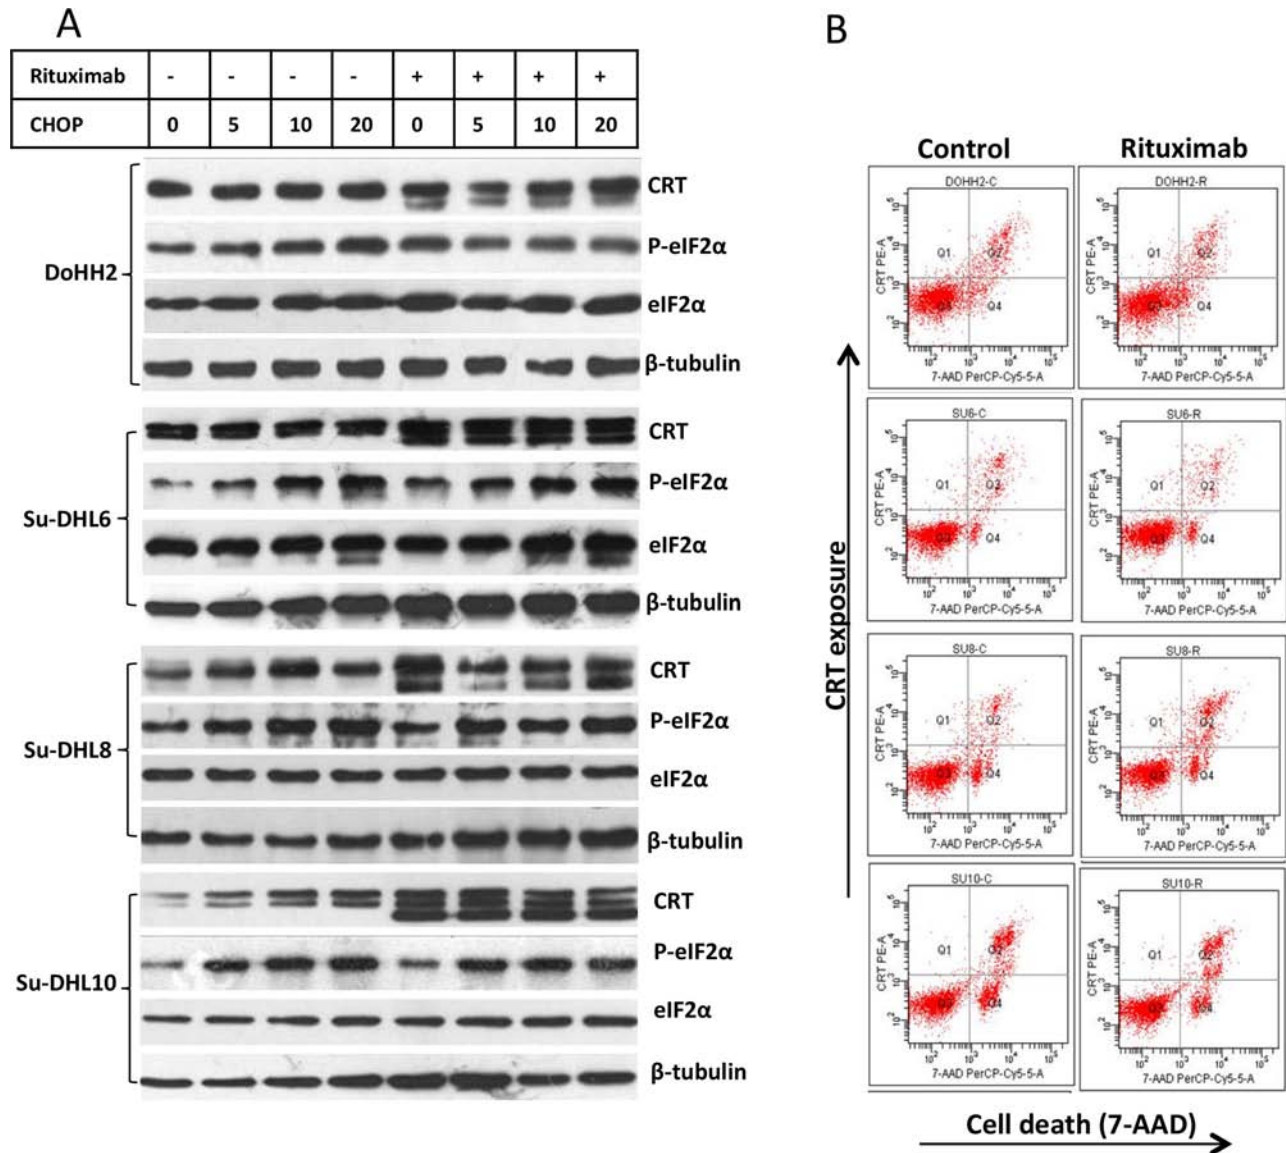

**Supplementary Figure S6: Effect of CHOP or R-CHOP in inducing eIF2 $\alpha$  phosphorylation (A) and CRT exposure (B).** **A.** DLBCL cells were treated with CHOP or R-CHOP for 24 hours. Expression of CRT, P-eIF2 $\alpha$  and P-eIF2 $\alpha$  were determined by Western blotting. **B.** DLBCL cells were treated with rituximab for 4 hours. After fixation, cells were stained with CRT-PE and 7-AAD. Cells with CRT exposure were defined as 7-AAD negative and CRT-PE positive. We were not be able to identify CHOP-induced CRT exposure due to the auto-fluorescence of CHOP.

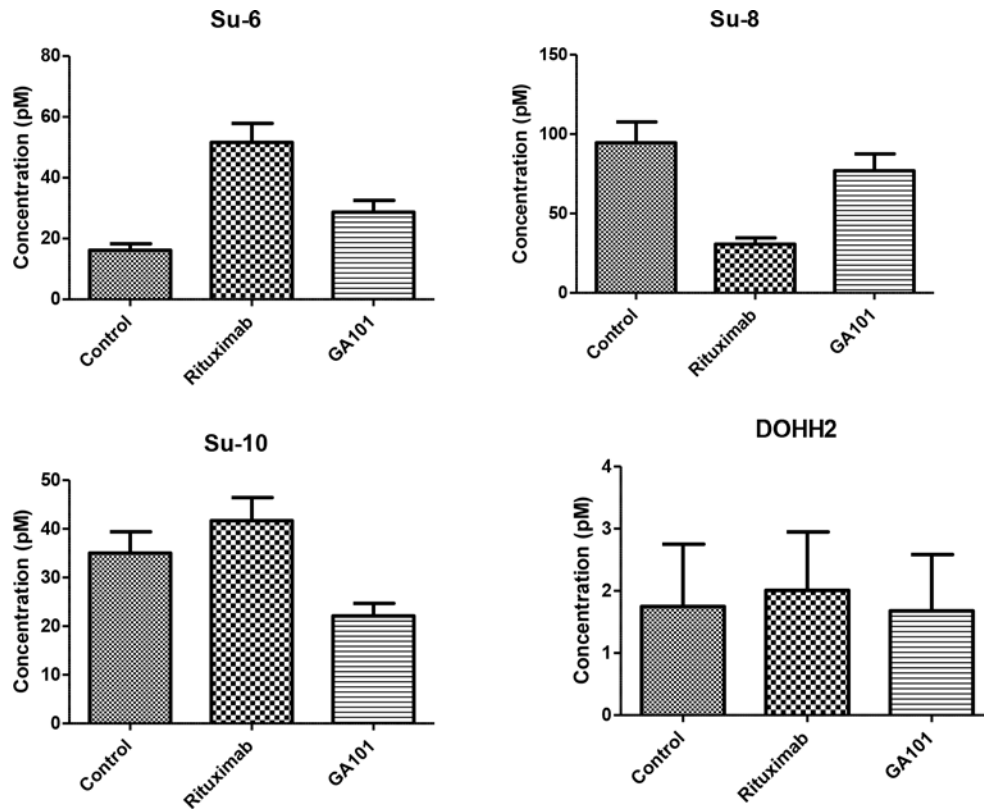

**Supplementary Figure S7: Rituximab or GA101-induced ATP release.** DLBCL cells were treated with 10  $\mu$ g/ml of rituximab or GA101 for 4 hours. ATP concentration in the conditioned medium (10  $\mu$ l) was determined using ATP chemiluminescence ELISA kit.



**Supplementary Table S1: Summary of clinical characteristics of DLBCL patients' plasma used for ELISA**

|                           | No of patients | Percentage |
|---------------------------|----------------|------------|
| <b>Total No</b>           | 40             | 100%       |
| <b>Age</b>                |                |            |
| >50                       | 26             | 65%        |
| <50                       | 14             | 35%        |
| <b>Gender</b>             |                |            |
| Male                      | 25             | 62.5%      |
| Female                    | 15             | 37.5%      |
| <b>Stage at diagnosis</b> |                |            |
| I                         | 4              | 10%        |
| II                        | 18             | 45%        |
| III                       | 6              | 15%        |
| IV                        | 12             | 30%        |
| <b>IPI score</b>          |                |            |
| 0                         | 11             | 27.5%      |
| 1                         | 18             | 45%        |
| 2                         | 7              | 17.5%      |
| 3                         | 4              | 10%        |
| <b>Treatment with</b>     |                |            |
| CHOP                      | 24             | 60%        |
| R-CHOP                    | 16             | 40%        |
| <b>Treatment response</b> |                |            |
| No response               | 0              | 0%         |
| CHOP-PR                   | 24             | 100%*      |
| CHOP-CR                   | 0              | 0%*        |
| R-CHOP-PR                 | 12             | 75%**      |
| R-CHOP-CR                 | 4              | 25%**      |

Note: \* indicates percentages of patients who were treated with CHOP and \*\* means percentages of patients who were treated with R-CHOP.

**Supplementary Table S2: Preparation of CHOP**

| Drug (supplier)          | Clinical Dose (mg/m <sup>2</sup> ) | Calculated ratio | Concentration* (mg/ml) | Amount of drug added to make CHOP, ml (mg) |
|--------------------------|------------------------------------|------------------|------------------------|--------------------------------------------|
| Cyclophosphamide (Sigma) | 750                                | 83.20            | 20                     | 4.16 (83.2)                                |
| Doxorubicin (Sigma)      | 50                                 | 5.55             | 2                      | 2.75 (5.5)                                 |
| Vincristine (Sigma)      | 1.4                                | 0.16             | 1                      | 0.16 (0.16)                                |
| Prednisolone (Sigma)     | 100                                | 11.09            | 20                     | 0.55 (11.1)                                |
| <b>Total Dose</b>        | 901.4                              | 100              | 10                     | made up to 10                              |

Note: The final concentration of CHOP is 10 mg/ml. The aliquots were stored at -80°C.

\* indicates the concentration of each drug prepared in DMSO.

**Supplementary Table S3: List of primary antibodies**

| Name of antibody              | Type     | Company         | Cat No        | Application | Dilution |
|-------------------------------|----------|-----------------|---------------|-------------|----------|
| <b>β-actin</b>                | Mouse    | Sigma           | A5316         | WB          | 1:10,000 |
| <b>BSA</b>                    | Mouse    | Sigma           | B2901         | WB          | 1:5000   |
| <b>Cathepsin D</b>            | Rabbit   | Abcam           | ab72915       | WB          | 1:1000   |
| <b>Cathepsin D</b>            | Mouse    | Sigma           | C0715         | IF          | 1:100    |
| <b>CD80-PE</b>                | Mouse    | Biologend       | 305208        | FC          | 1:20     |
| <b>CD83-PE</b>                | Mouse    | Biologend       | 305308        | FC          | 1:20     |
| <b>CRT-PE</b>                 | Mouse    | Enzo            | ADI-SPA-601PE | FC          | 5 μg/ml  |
| <b>CRT</b>                    | Rabbit   | Cell Signalling | 12238         | WB          | 1:1000   |
| <b>GA-101</b>                 | Human    | Roche           |               | Treatment   | 10 μg/ml |
| <b>eIF2α</b>                  | Rabbit   | Cell Signalling | 9722          | WB          | 1:1000   |
| <b>eIF2α-P<sup>S51</sup></b>  | Rabbit   | Cell Signalling | 9721          | WB          | 1:1000   |
| <b>HMGB1</b>                  | Rabbit   | Abcam           | ab18256       | IP          | 1:100    |
|                               |          |                 |               | IF          | 1:200    |
| <b>HMGB1</b>                  | Mouse    | Sigma           | WH0003146M8   | WB          | 1:1000   |
|                               |          |                 |               | IF          | 1:200    |
| <b>OKT3</b>                   | Mouse    | Abcam           | ab86883       | Treatment   | 10 μg/ml |
| <b>Rituximab</b>              | Chimeric | Roche           |               | Treatment   | 10 μg/ml |
| <b>S6-ribosome protein</b>    | Rabbit   | Cell Signalling | 2217          | IF          | 1:100    |
| <b>STAT3</b>                  | Mouse    | Cell Signalling | 9139          | WB          | 1:1000   |
| <b>STAT3-P<sup>S727</sup></b> | Rabbit   | ImmunoWay       | YP0250        | WB          | 1:1000   |
|                               |          |                 |               | IP          | 1:100    |
| <b>STAT3-P<sup>S727</sup></b> | Rabbit   | Cell Signalling | 9134          | IF          | 1:100    |
| <b>STAT3-P<sup>V705</sup></b> | Mouse    | Cell Signalling | 9138          | WB          | 1:1000   |
|                               |          |                 |               | IP          | 1:100    |
| <b>STAT3-P<sup>V705</sup></b> | Rabbit   | Cell Signalling | 9145          | WB          | 1:1000   |
|                               |          |                 |               | IP          | 1:100    |
|                               |          |                 |               | IF          | 1:100    |
| <b>PARP</b>                   | Rabbit   | Beyotime Biotec | AP102         | WB          | 1:1000   |
| <b>β-tubulin</b>              | Mouse    | Abmart          | M 20005       | WB          | 1:1000   |

Note: FC = flow cytometry; IF = Immuno-fluorescent staining; IP = Immuno-precipitation; WB = Western blotting.

**Supplementary Table S4: List of secondary antibodies**

| Name of antibody                 | Type   | Company    | Cat No. | Application | Dilution |
|----------------------------------|--------|------------|---------|-------------|----------|
| Anti-mouse IgG -HRP              | Goat   | Santa Cruz | sc-2005 | WB          | 1:5000   |
| Anti-rabbit IgG -HRP             | Goat   | Santa Cruz | sc-2004 | WB          | 1:5000   |
| Alexa Fluor® 488 Anti-Rabbit IgG | Goat   | Invitrogen | A11034  | IF, FC      | 1:100    |
| Alexa Fluor® 546 Anti-rabbit IgG | Goat   | Invitrogen | A11035  | IF, FC      | 1:100    |
| Alexa Fluor® 488 Anti-Mouse IgG  | Donkey | Invitrogen | A21202  | IF, FC      | 1:100    |
| Alexa Fluor® 546 Anti-Mouse IgG  | Donkey | Invitrogen | A10036  | IF, FC      | 1:100    |
